# Supplementary material for: One-pot preparation of polylactic acid-ibuprofen conjugates and their performance characterization
Source: Royal Society of Chemistry journal article supplement (doi:10.1039/c7py01213f), 2017-01-01
Supplement: c7py01213f1.pdf [file c7py01213f1.pdf]

# Electronic Supplementary Information

## One-pot Preparation of Polylactic acid-ibuprofen Conjugates and Their Performance Characterization

Shi-He Luo,<sup>ab</sup> Yan-Cheng Wu,<sup>ad</sup> Liang Cao,<sup>a</sup> Qun-Fang Wang,<sup>a</sup> Shui-Xia Chen,<sup>b\*</sup> Zhi-Feng Hao,<sup>c</sup>  
Le Jing<sup>a</sup> and Zhao-Yang Wang<sup>a\*</sup>

a. School of Chemistry and Environment, South China Normal University; Key Laboratory of Theoretical Chemistry of Environment, Ministry of Education, Guangzhou 510006, P. R. China.

b. PCFM Lab, School of Chemistry and Chemical Engineering, Sun Yat-Sen University, Guangzhou 510275, P. R. China; Materials Science Institute, Sun Yat-Sen University, Guangzhou 510275, P. R. China.

c. School of Chemical Engineering and Light Industry, Guangdong University of Technology, Guangzhou 510006, P. R. China.

d. College of Materials Science and Engineering, South China University of Technology, Guangzhou 510641, P. R. China

Corresponding author E-mail: wangzy@scnu.edu.cn.; cescsx@mail.sysu.edu.cn.

## Contents

|                                                                                                               |    |
|---------------------------------------------------------------------------------------------------------------|----|
| <b>Figure S1.</b> The <sup>1</sup> H NMR spectrum of IBU .....                                                | 2  |
| <b>Figure S2.</b> The <sup>1</sup> H NMR spectra of different feed ratios (LA/IBU) .....                      | 3  |
| <b>Figure S3.</b> The calibration curve of IBU in CHCl <sub>3</sub> .....                                     | 4  |
| <b>Figure S4.</b> UV spectrum of ibuprofen in CHCl <sub>3</sub> with 5 mg/mL .....                            | 5  |
| <b>Figure S5.</b> UV spectra of a solution of PLA-IBU at various molar feed ratios in CHCl <sub>3</sub> ..... | 6  |
| <b>Figure S6.</b> UV spectra of IBU solution with various concentrations in PBS .....                         | 7  |
| <b>Figure S7.</b> The calibration curve of IBU in PBS .....                                                   | 8  |
| <b>Figure S8.</b> The drug release of PLA-IBU with different feed ratios (LA/IBU) in PBS .....                | 9  |
| <b>Figure S9.</b> The results of antibiogram assays with PLA-IBU .....                                        | 10 |

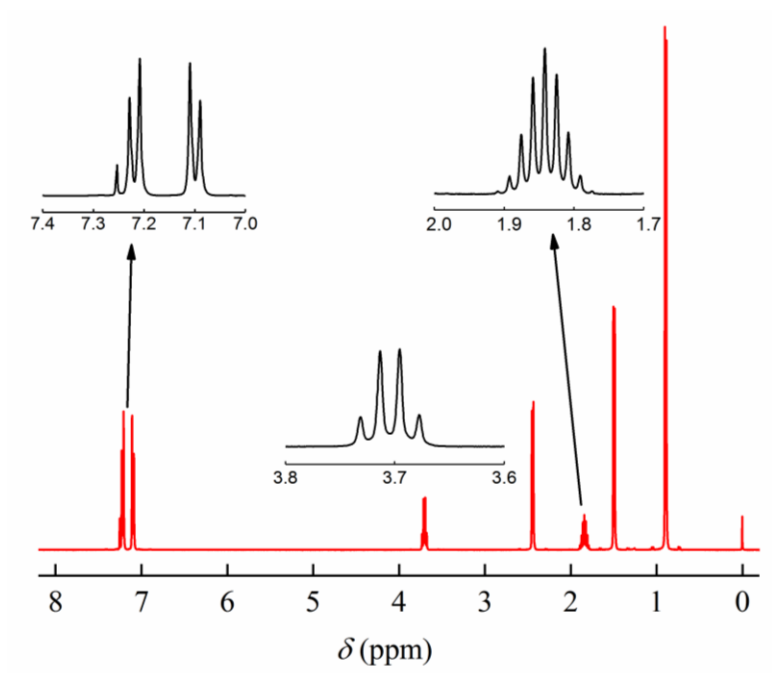

**Figure S1.** The  $^1\text{H}$  NMR spectrum of IBU.

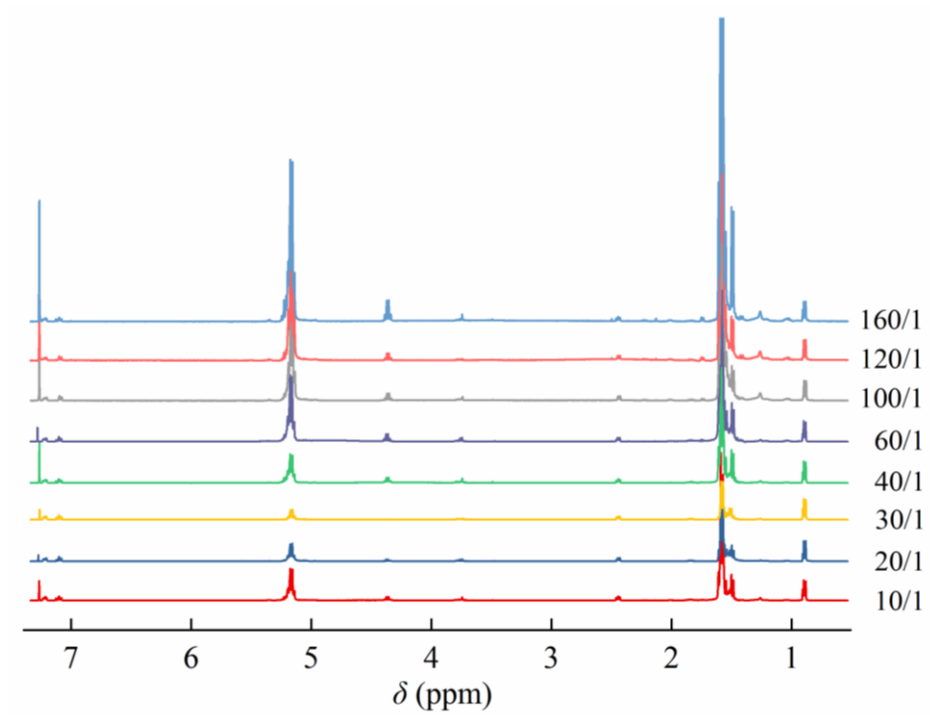

**Figure S2.** The <sup>1</sup>H NMR spectra of different feed ratios (LA/IBU).

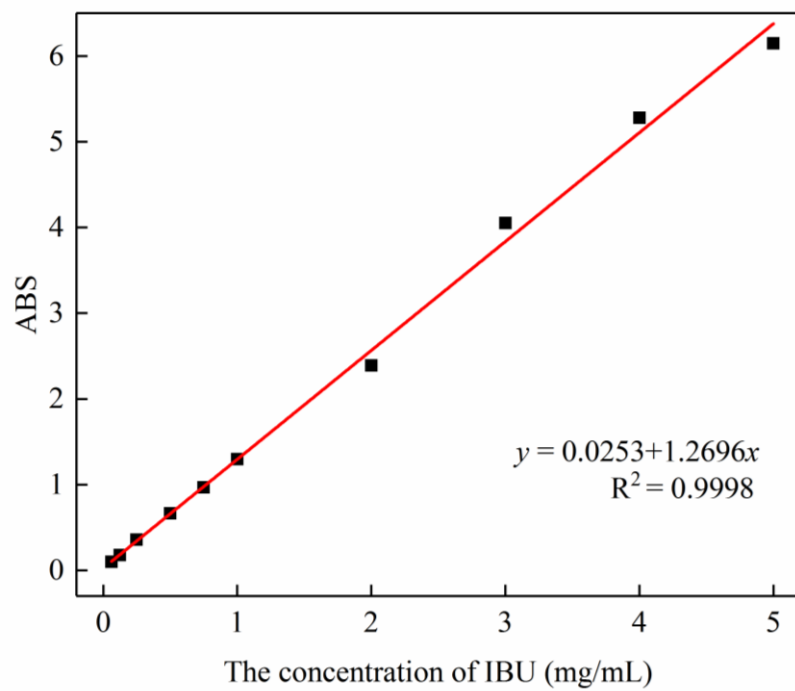

**Figure S3.** The calibration curve of IBU in  $\text{CHCl}_3$ .

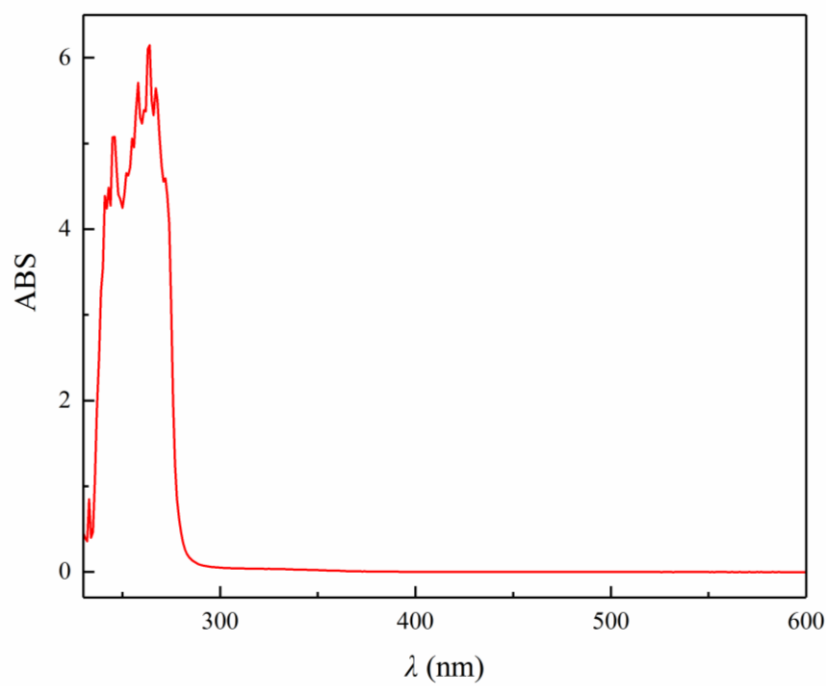

**Figure S4.** UV spectrum of ibuprofen in CHCl<sub>3</sub> with 5 mg/mL.

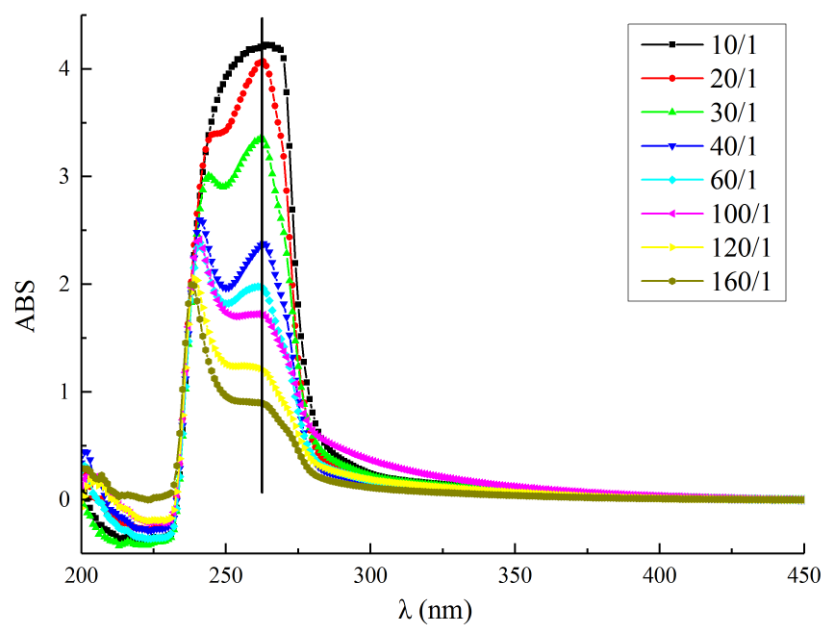

**Figure S5.** UV spectra of a solution of PLA-IBU at various molar feed ratios in CHCl<sub>3</sub>.

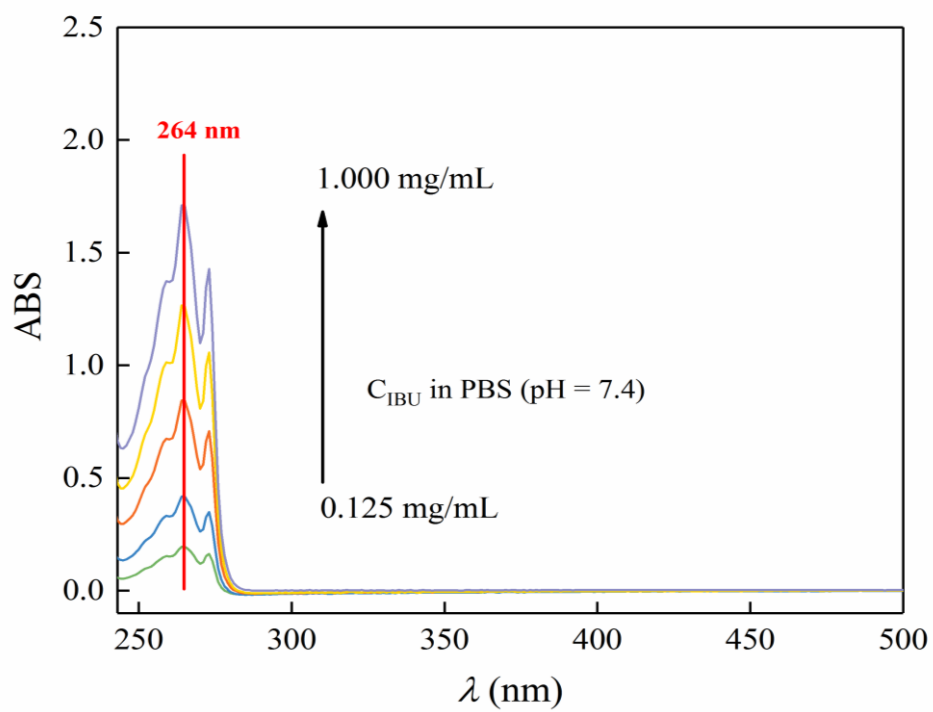

**Figure S6.** UV spectra of IBU solution with various concentrations in PBS.

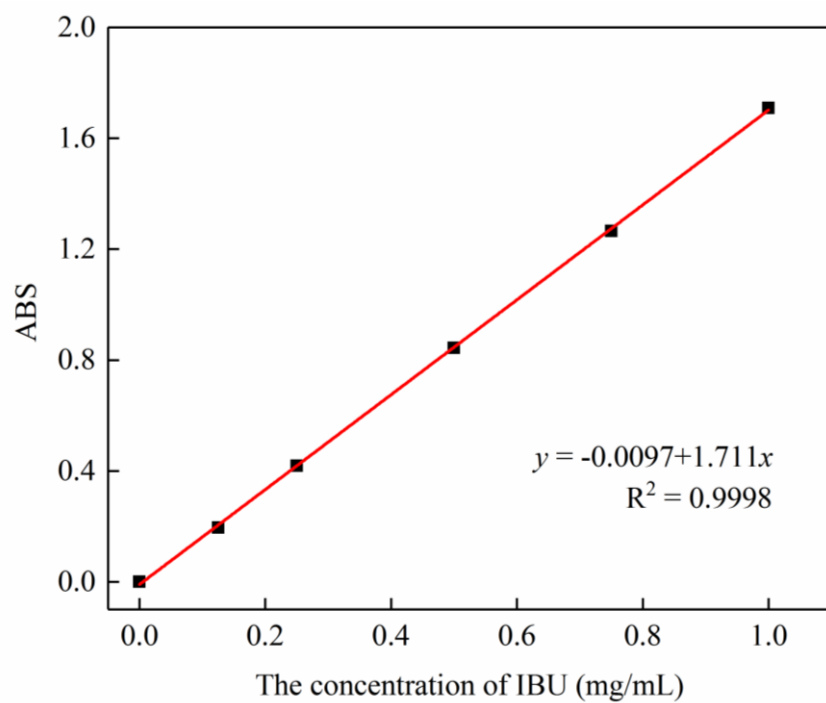

**Figure S7.** The calibration curve of IBU in PBS.



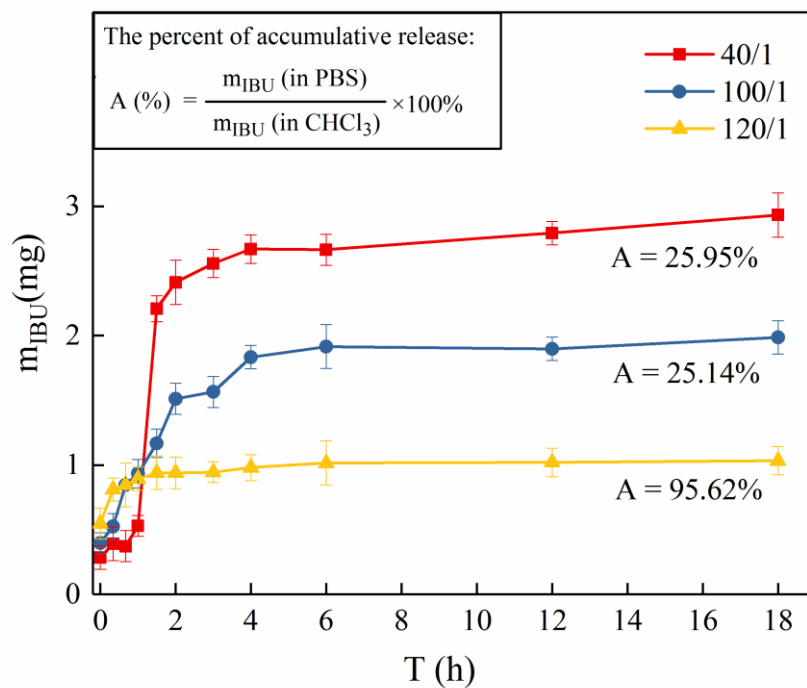

**Figure S8.** The drug release of PLA-IBU with different feed ratios (LA/IBU) in PBS.

| Culturing for 0 h                                                                                      |                                                                                                         |                                                                                                         | Culturing for 18 h                                                                                      |                                                                                                         |                                                                                                           |                                                                                                           |                                                                                                           |
|--------------------------------------------------------------------------------------------------------|---------------------------------------------------------------------------------------------------------|---------------------------------------------------------------------------------------------------------|---------------------------------------------------------------------------------------------------------|---------------------------------------------------------------------------------------------------------|-----------------------------------------------------------------------------------------------------------|-----------------------------------------------------------------------------------------------------------|-----------------------------------------------------------------------------------------------------------|
| Negative controls                                                                                      | Positive controls                                                                                       | PLA                                                                                                     | Negative controls                                                                                       | Positive controls                                                                                       | PLA-IBU with 20                                                                                           | PLA-IBU with 120                                                                                          | PLA                                                                                                       |
| 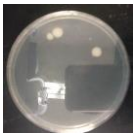<br>parallel test I    | <br>parallel test I    | <br>parallel test I    | <br>parallel test I    | <br>parallel test I    | <br>parallel test I    | <br>parallel test I    | <br>parallel test I    |
| <br>parallel test II   | <br>parallel test II   | <br>parallel test II   | <br>parallel test II   | <br>parallel test II   | <br>parallel test II   | <br>parallel test II   | <br>parallel test II   |
| <br>parallel test III | <br>parallel test III | <br>parallel test III | <br>parallel test III | <br>parallel test III | <br>parallel test III | <br>parallel test III | <br>parallel test III |

**Figure S9.** The results of antibiogram assays with PLA-IBU.
